# Supplementary material for: COVID-19 vaccine hesitancy and vaccine passports: a cross-sectional conjoint experiment in Japan
Source: HighWire-hosted journal article supplement (doi:10.1136/bmjopen-2022-060829), 2022-06-01
Supplement: bmjopen-2022-060829supp001_data_supplement.pdf [file bmjopen-2022-060829supp001_data_supplement.pdf]

## **Supplementary Material for COVID-19 vaccine hesitancy and vaccine passports: a cross-sectional conjoint experiment in Japan**

Shohei Okamoto<sup>\*1, 2, 3</sup>, Kazuki Kamimura<sup>3, 4</sup>, Kohei Komamura<sup>3, 5</sup>

<sup>1</sup> Research Team for Social Participation and Community Health, Tokyo Metropolitan Institute of Gerontology, Tokyo, Japan

<sup>2</sup> Institute for Global Health Policy Research, National Center for Global Health and Medicine, Tokyo, Japan

<sup>3</sup> Research Center for Financial Gerontology, Keio University, Tokyo, Japan

<sup>4</sup> Hirao School of Management, Konan University, Hyogo, Japan

<sup>5</sup> Faculty of Economics, Keio University, Tokyo, Japan

Corresponding author: Dr Shohei Okamoto, Research Team for Social Participation and Community Health, Tokyo Metropolitan Institute of Gerontology: 35-2 Sakae-cho, Itabashi-ku, Tokyo, Japan 1730015 (E-mail: [shohei@z2.keio.jp](mailto:shohei@z2.keio.jp))

### **Contents**

#### **Appendix Tables:**

Appendix Table A-1. Determinants of vaccine hesitancy

#### **Appendix Figures:**

Appendix Figure A-1. Determinants of reasons for vaccine hesitancy: Other mistrust

Appendix Figure A-2. Determinants of reasons for vaccine hesitancy: Attitudes toward COVID-19

Appendix Figure A-3. Determinants of reasons for vaccine hesitancy: Health-related reasons

Appendix Figure A-4. Determinants of reasons for vaccine hesitancy: Other reasons

Appendix Figure A-5. Vaccine passport: Preference transitivity

Appendix Figure A-6. Vaccine passport: Separate analyses of those undecided and unwilling to vaccinate

Appendix Figure A-7. Vaccine passport: Include those willing to vaccinate

Appendix Figure A-8. Vaccine passport: Exclude uniform individuals

Appendix Figure A-9. Vaccine passport: Estimates by multilevel mixed-effects logistic regression

Appendix Table A-1. Determinants of vaccine hesitancy

| Vaccine hesitancy                       | Will not vaccinate   |             | Undecided            |             |
|-----------------------------------------|----------------------|-------------|----------------------|-------------|
|                                         | Relative risk ratios | 95%CI       | Relative risk ratios | 95%CI       |
| Age (Ref. 45-49): 20-24                 | 1.48                 | 0.95 - 2.30 | 0.94                 | 0.63 - 1.41 |
| 25-29                                   | 1.97**               | 1.36 - 2.85 | 1.83**               | 1.35 - 2.47 |
| 30-34                                   | 2.08**               | 1.40 - 3.09 | 1.47*                | 1.07 - 2.03 |
| 35-39                                   | 2.22**               | 1.55 - 3.18 | 1.63**               | 1.22 - 2.19 |
| 40-44                                   | 1.46                 | 0.99 - 2.15 | 1.25                 | 0.92 - 1.70 |
| 50-54                                   | 0.87                 | 0.58 - 1.29 | 0.75                 | 0.55 - 1.04 |
| 55-59                                   | 0.89                 | 0.59 - 1.35 | 0.55**               | 0.38 - 0.78 |
| 60-64                                   | 0.53**               | 0.35 - 0.79 | 0.33**               | 0.23 - 0.47 |
| 65-69                                   | 0.24**               | 0.13 - 0.42 | 0.14**               | 0.08 - 0.23 |
| 70-74                                   | 0.30**               | 0.18 - 0.51 | 0.11**               | 0.07 - 0.20 |
| Female                                  | 1.08                 | 0.88 - 1.32 | 1.26**               | 1.06 - 1.51 |
| Co-residence: Aged 65 or older          | 0.75*                | 0.60 - 0.95 | 0.91                 | 0.74 - 1.11 |
| Aged 11 or younger                      | 0.68*                | 0.50 - 0.92 | 1.10                 | 0.88 - 1.38 |
| Chronic illness                         | 0.53**               | 0.41 - 0.68 | 0.59**               | 0.47 - 0.73 |
| Occupation: Healthcare worker           | 0.26**               | 0.16 - 0.43 | 0.20**               | 0.13 - 0.33 |
| Other essential workers                 | 0.56**               | 0.43 - 0.73 | 0.83                 | 0.67 - 1.04 |
| Other occupations                       | 0.70**               | 0.55 - 0.89 | 0.88                 | 0.71 - 1.09 |
| Education: Junior college or vocational | 0.82                 | 0.63 - 1.07 | 0.87                 | 0.69 - 1.10 |
| University or higher                    | 0.60**               | 0.48 - 0.75 | 0.74**               | 0.61 - 0.90 |
| Household income                        | 0.96*                | 0.94 - 0.99 | 0.94**               | 0.92 - 0.97 |
| Self-rated health                       | 0.79**               | 0.71 - 0.88 | 0.85**               | 0.78 - 0.92 |
| K10 depression scale                    | 1.01**               | 1.00 - 1.03 | 1.01                 | 1.00 - 1.02 |
| Statistical literacy                    | 0.85**               | 0.75 - 0.96 | 1.05                 | 0.94 - 1.17 |
| Time preference                         | 1.01*                | 1.00 - 1.01 | 1.01*                | 1.00 - 1.01 |
| Risk attitudes                          | 1.00                 | 0.99 - 1.02 | 0.99                 | 0.98 - 1.00 |
| Fear of COVID-19                        | 0.95**               | 0.93 - 0.97 | 0.99                 | 0.98 - 1.01 |
| Constant                                | 3.01*                | 1.25 - 7.22 | 1.35                 | 0.64 - 2.85 |
| Observations                            | 5,000                |             |                      |             |

Note: The outcome reference is 'Willing to vaccinate or have already vaccinated'; \*\* p<0.01, \* p<0.05; 95% confidence intervals (CI) were estimated by robust standard errors; Adjusted for residential area with the population weight for each age group by region.

Appendix Figure A-1. Determinants of reasons for vaccine hesitancy: Other mistrust

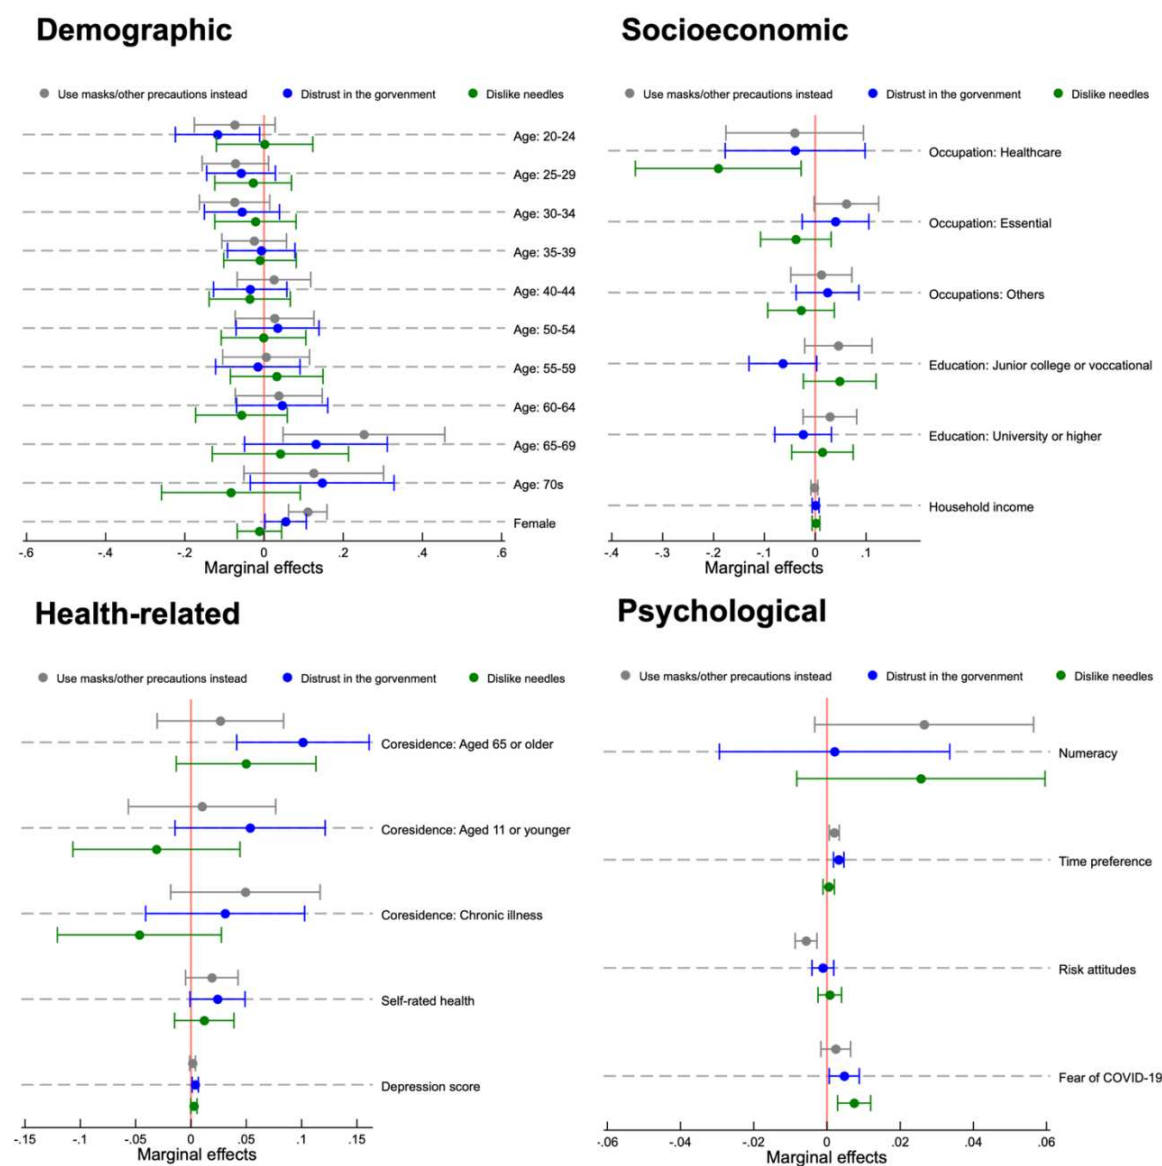

Note: Analyses among individuals who were undecided and unwilling to vaccinate (n= 1,518); Markers represent marginal effects with error bars showing 95% confidence intervals estimated by robust standard errors; Adjusted for residential area with the population weight for each age group.

Appendix Figure A-2. Determinants of reasons for vaccine hesitancy: Attitudes toward COVID-19

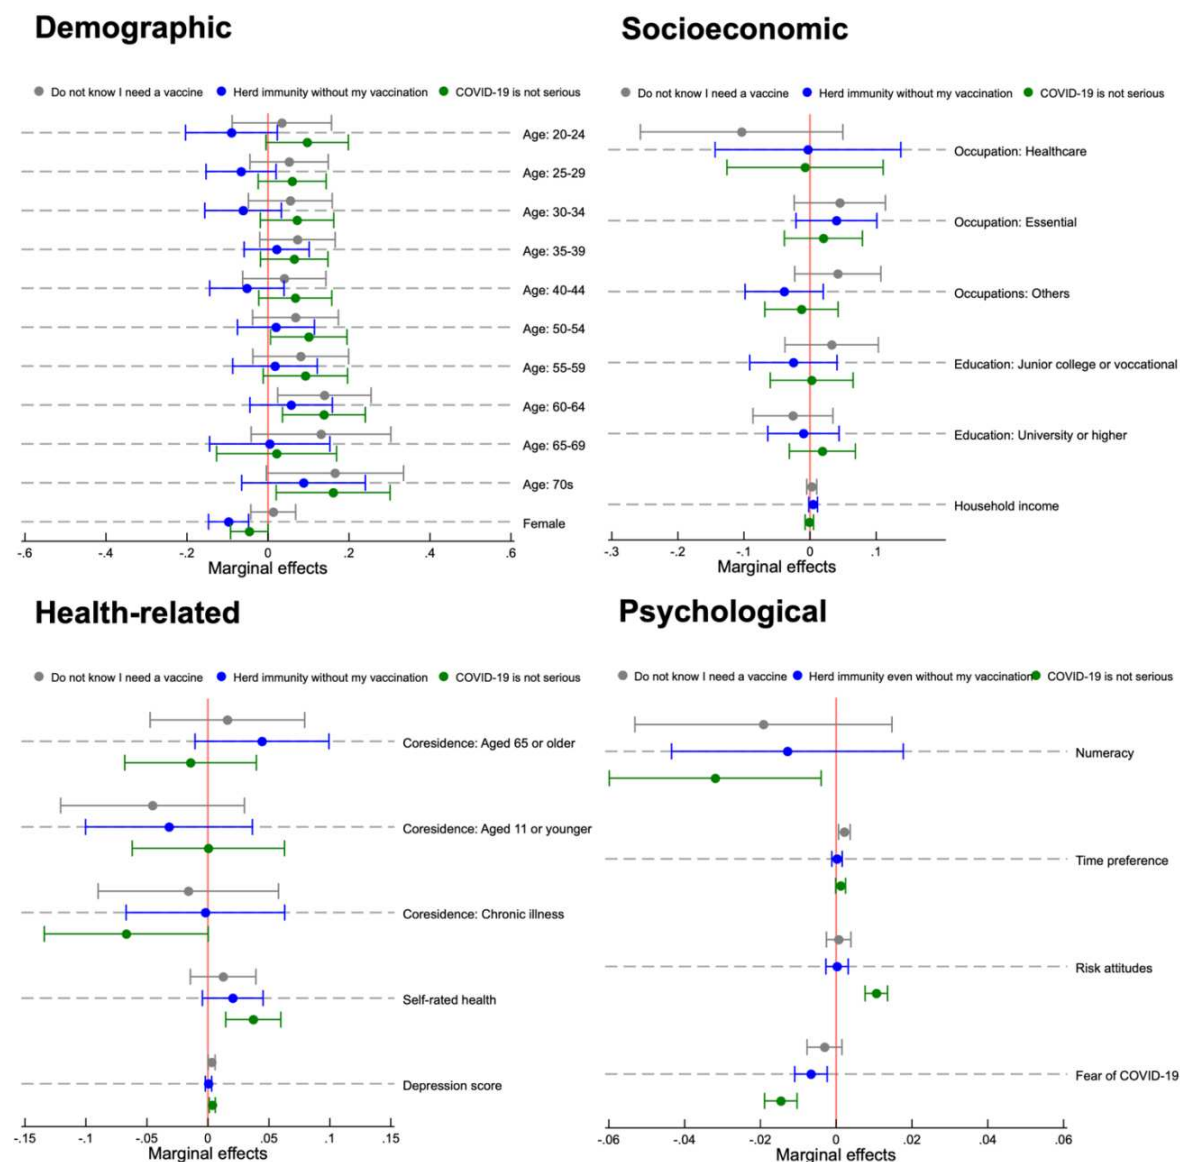

Note: Analyses among individuals who were undecided and unwilling to vaccinate (n= 1,518); Markers represent marginal effects with error bars showing 95% confidence intervals estimated by robust standard errors; Adjusted for residential area with the population weight for each age group;

Appendix Figure A-3. Determinants of reasons for vaccine hesitancy: Health-related reasons

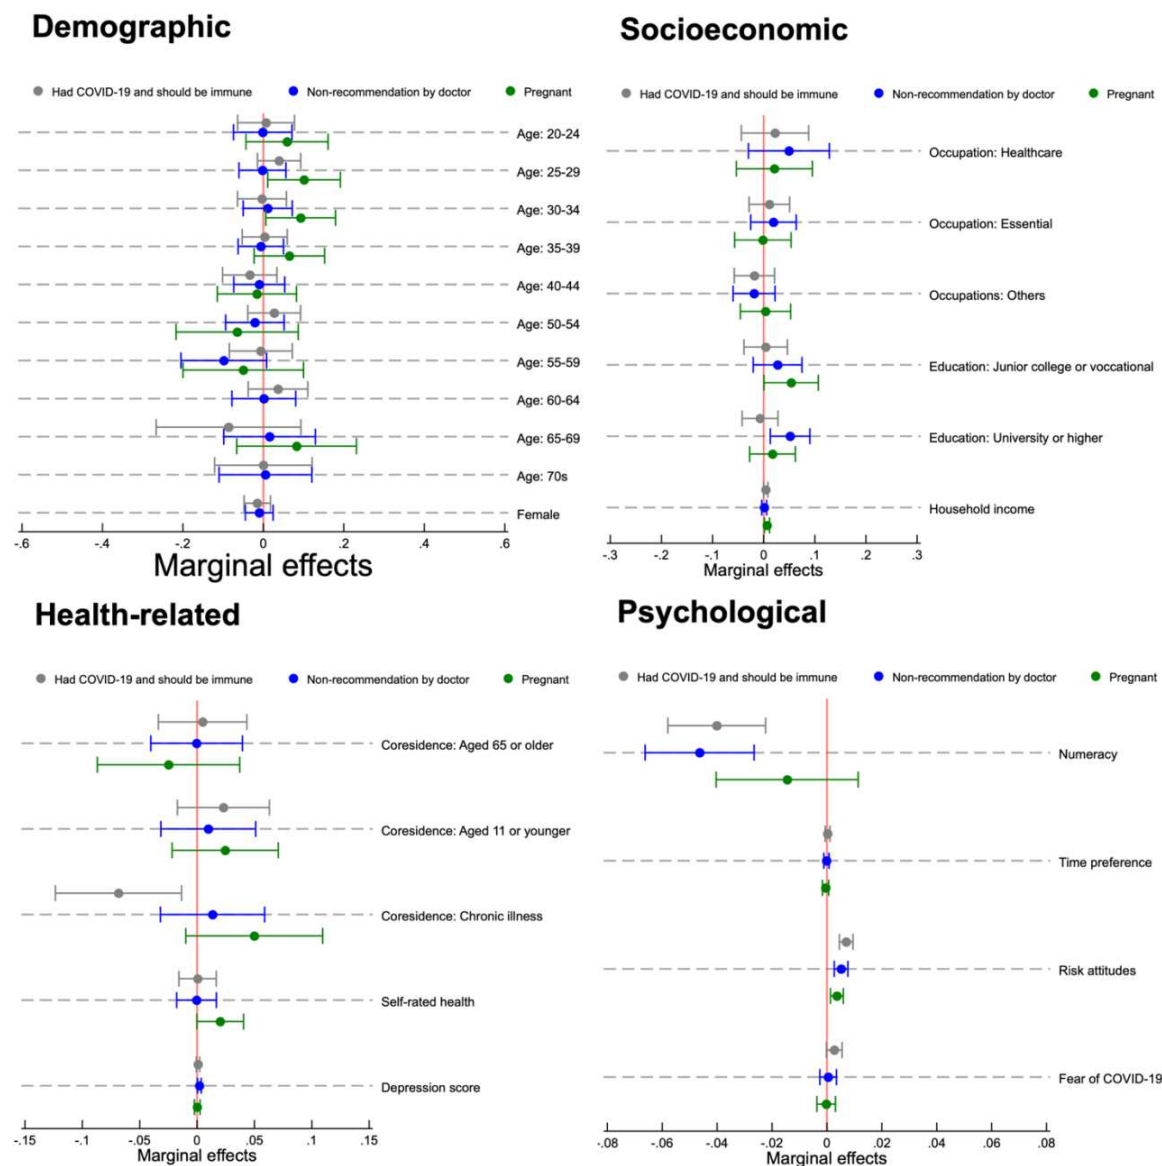

Note: Analyses among individuals who were undecided and unwilling to vaccinate (n= 1,518); Markers represent marginal effects with error bars showing 95% confidence intervals estimated by robust standard errors; Adjusted for residential area with the population weight for each age group;

Appendix Figure A-4. Determinants of reasons for vaccine hesitancy: Other reasons

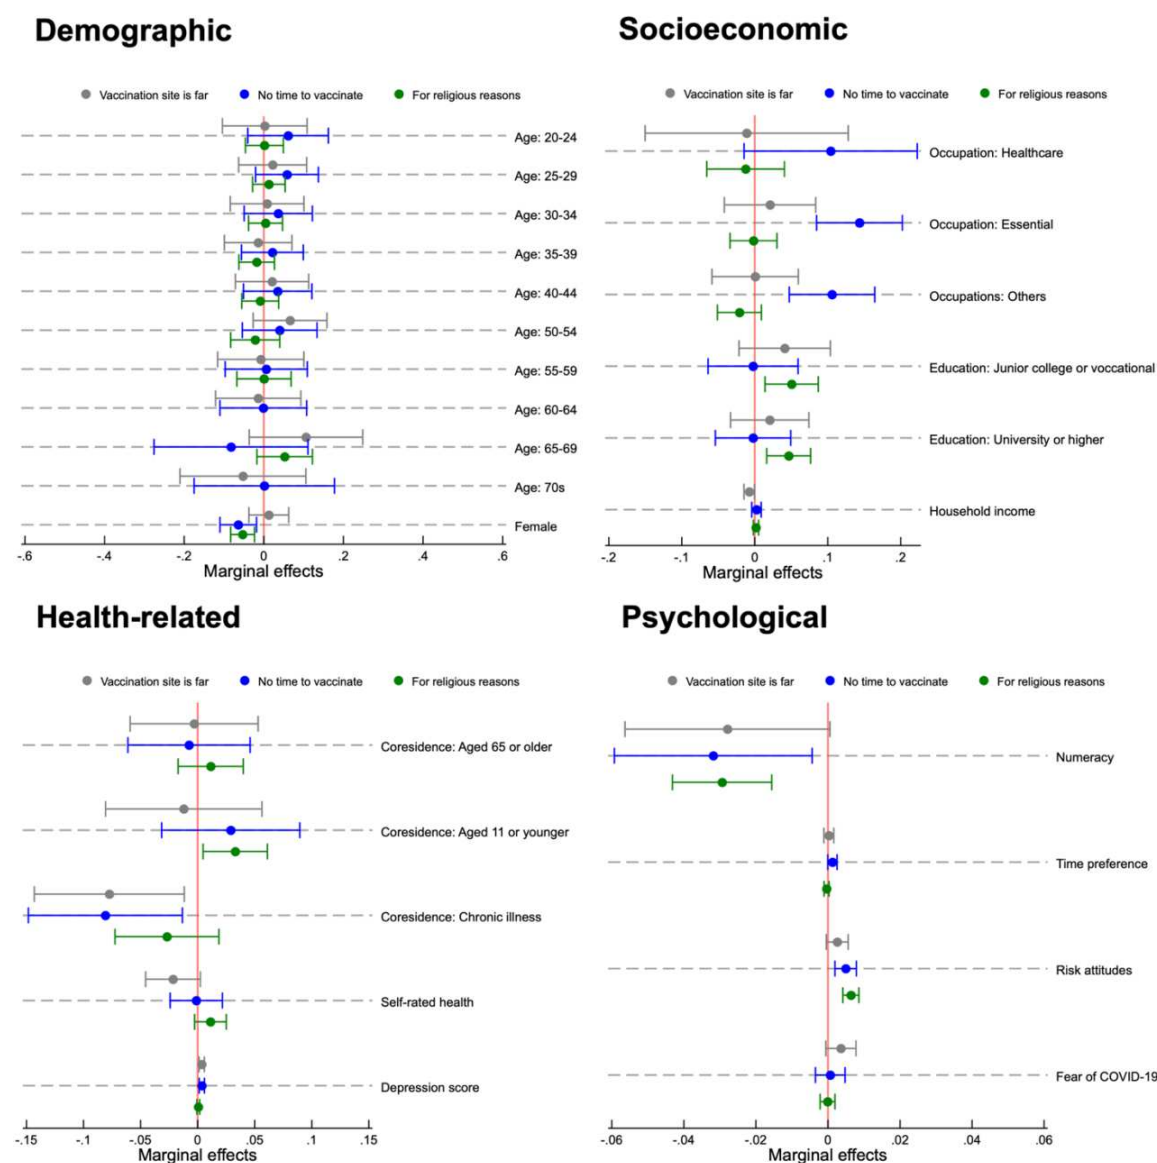

Note: Analyses among individuals who were undecided and unwilling to vaccinate (n= 1,518); Markers represent marginal effects with error bars showing 95% confidence intervals estimated by robust standard errors; Adjusted for residential area with the population weight for each age group;

Appendix Figure A-5. Vaccine passport: Exclude those with non-transitive preferences

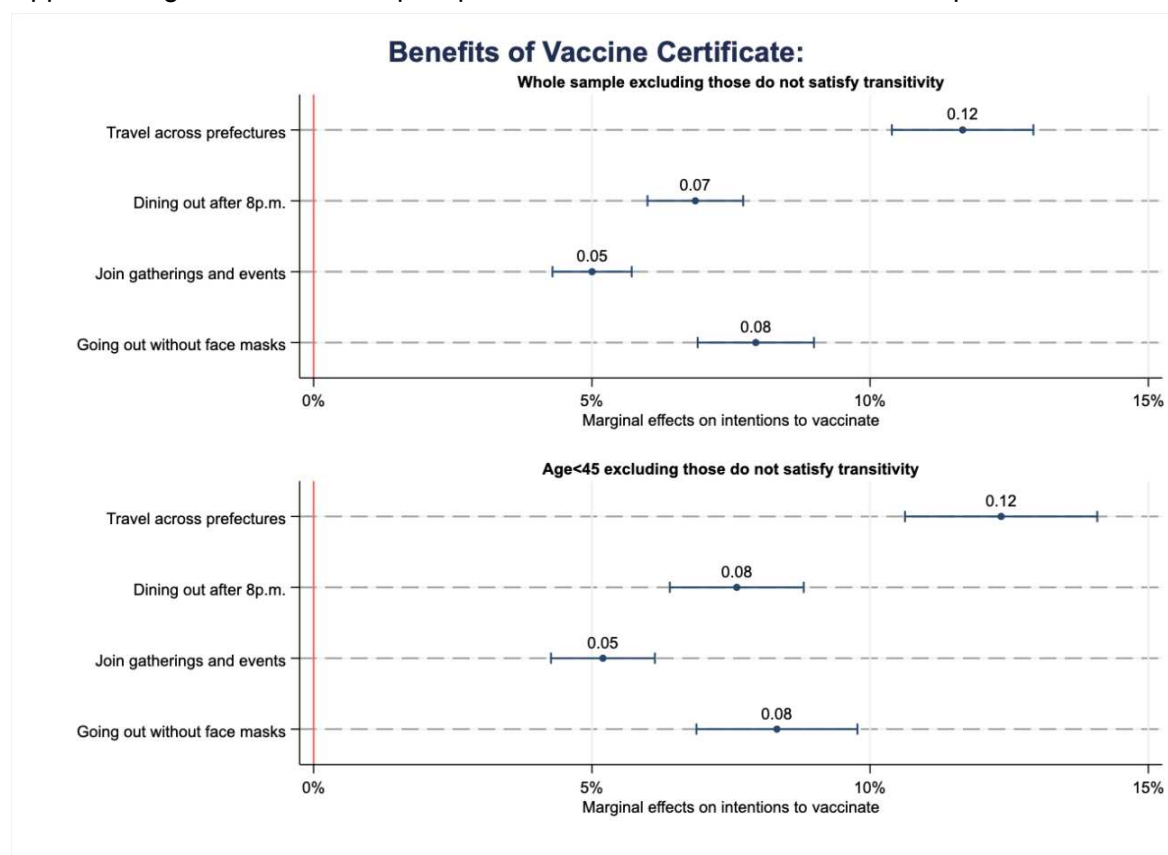

Note: Estimates among individuals who were undecided and unwilling to vaccinate, excluding those who did not satisfy transitivity of the vaccine preference (n= 1,416 for all age groups and n= 815 for those aged 45 or younger); Adjusted for age, gender, co-resident family members, occupation, education, income, health status, statistical literacy, time preference, risk attitudes, fear of COVID-19, residential area, and vaccine attributes with the population weight for each age group by region; Values and markers are marginal effects with bars representing 95% confidence intervals estimated by robust standard errors; Full results are available upon request.

Appendix Figure A-6. Vaccine passport: Separate analyses of those undecided and unwilling to vaccinate

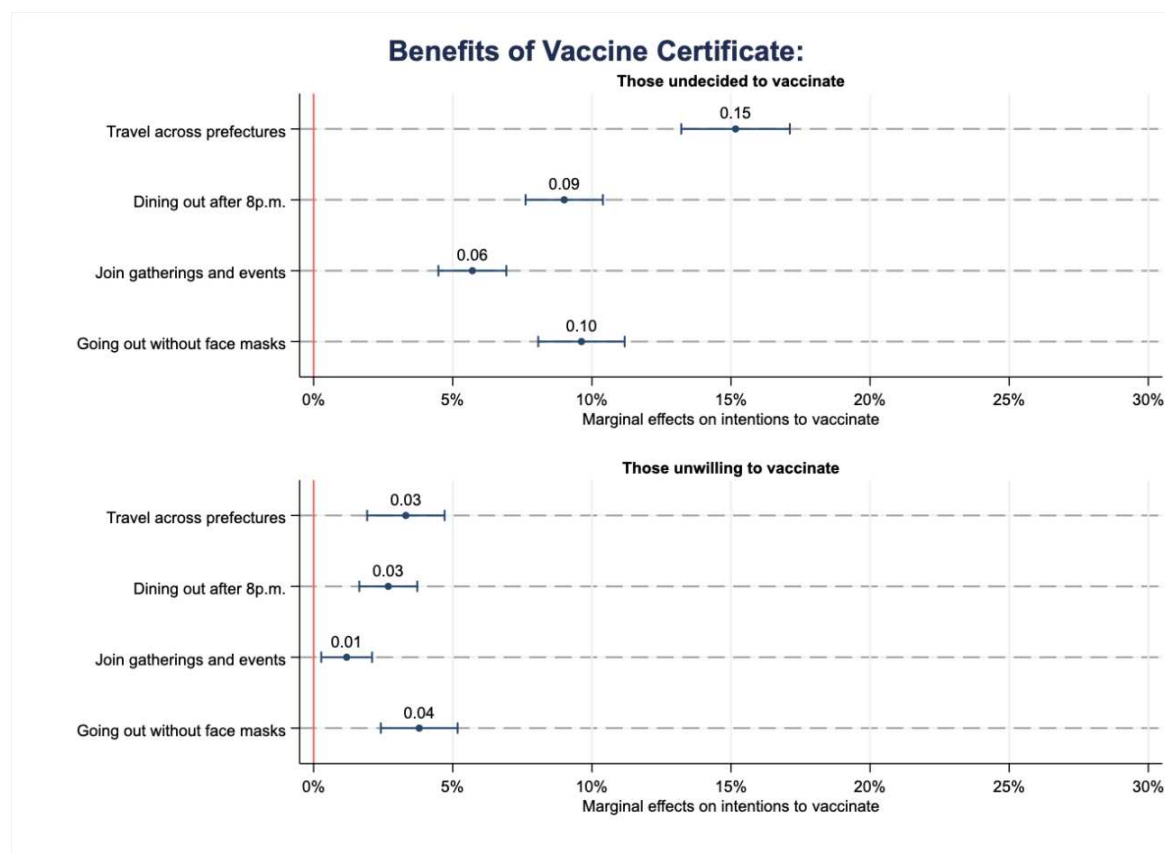

Note: Estimates among individuals who were unwilling to vaccinate (n= 894 for those undecided to vaccinate and n= 624 for those unwilling to vaccinate); Adjusted for age, gender, co-resident family members, occupation, education, income, health status, statistical literacy, time preference, risk attitudes, fear of COVID-19, residential area, and vaccine attributes with the population weight for each age group by region; Values and markers are marginal effects with bars representing 95% confidence intervals estimated by robust standard errors; Full results are available upon request.

Appendix Figure A-7. Vaccine passport: Include those willing to vaccinate

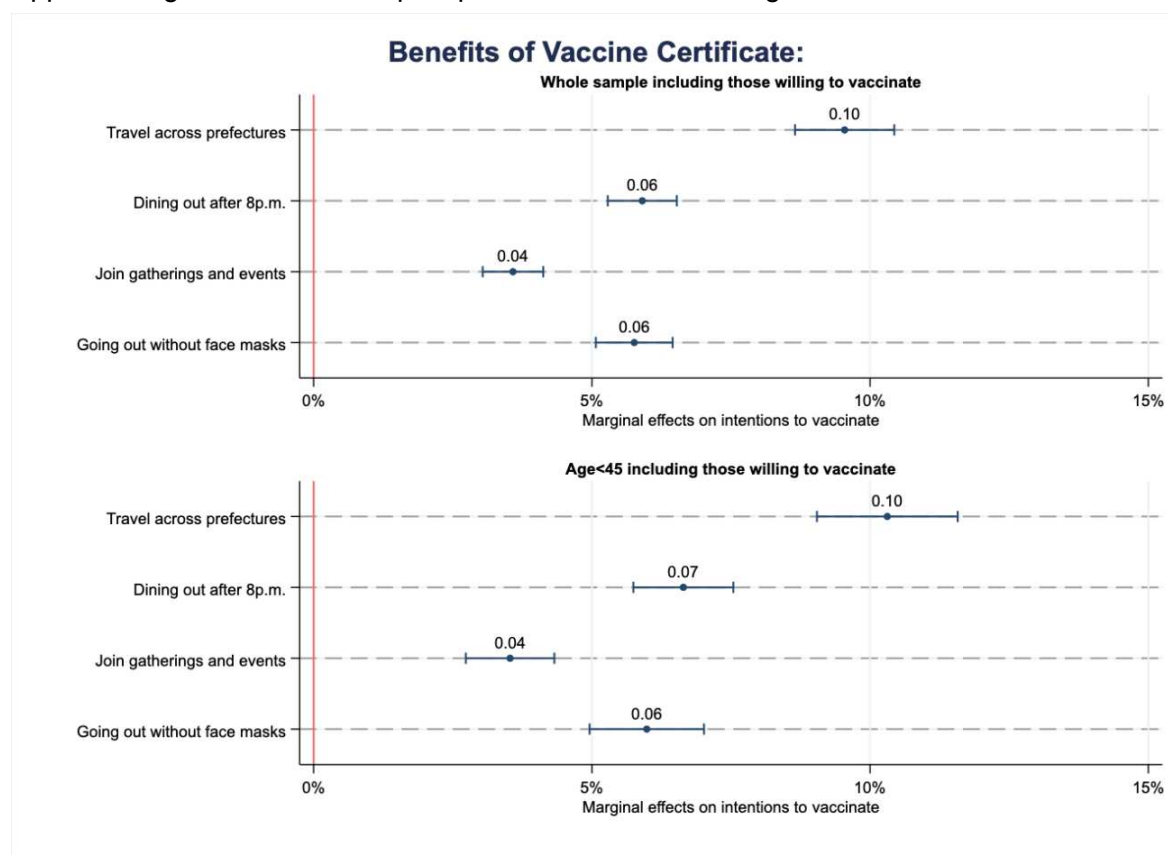

Note: Estimates among individuals who have not vaccinated yet, including 'Unwilling,' 'Undecided,' and 'Willing' (n= 3,171 for all age groups and n= 1,644 for those aged 45 or younger); Adjusted for age, gender, co-resident family members, occupation, education, income, health status, statistical literacy, time preference, risk attitudes, fear of COVID-19, residential area, and vaccine attributes with the population weight for each age group by region; Values and markers are marginal effects with bars representing 95% confidence intervals estimated by robust standard errors; Full results are available upon request.

Appendix Figure A-8. Vaccine passport: Exclude uniform individuals

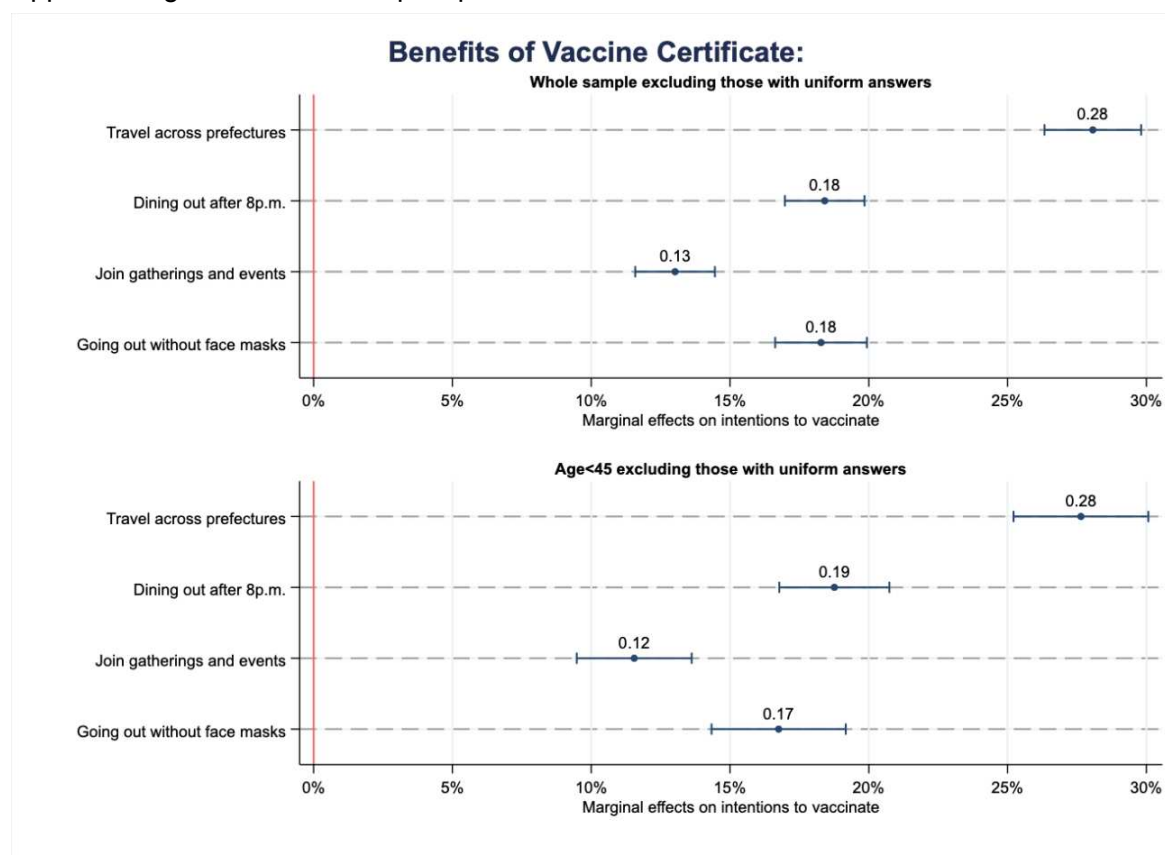

Note: Estimates among individuals who were undecided and unwilling to vaccinate, excluding those who provided uniform answers regarding their vaccination intentions regardless of available options (n= 1,531 for all age groups and n= 754 for those aged 45 or younger); Adjusted for age, gender, co-resident family members, occupation, education, income, health status, statistical literacy, time preference, risk attitudes, fear of COVID-19, residential area, and vaccine attributes with the population weight for each age group by region; Values and markers are marginal effects with bars representing 95% confidence intervals estimated by robust standard errors; Full results are available upon request.

Appendix Figure A-9. Vaccine passport: Estimates by multilevel mixed-effects logistic regression

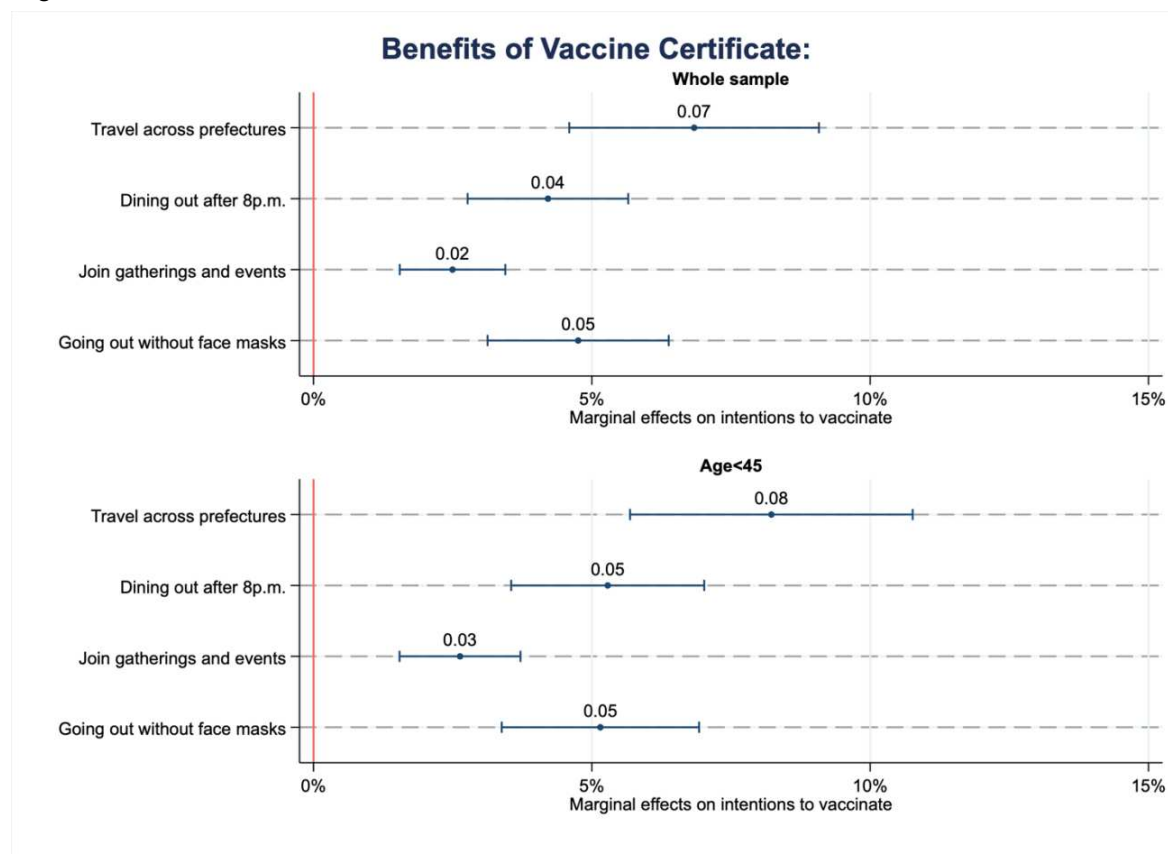

Note: Estimated by multilevel mixed-effects logistic regression with random intercepts by individuals among those who were undecided and unwilling to vaccinate (n= 1,518 for all age groups and n= 884 for those aged 45 or younger); Adjusted for age, gender, co-resident family members, occupation, education, income, health status, statistical literacy, time preference, risk attitudes, fear of COVID-19, residential area, and vaccine attributes with the population weight for each age group by region; Values and markers are marginal effects with bars representing 95% confidence intervals estimated by robust standard errors; Full results are available upon request.
